# Supplementary material for: Rational design of the pea-pod structure of SiOx/C nanofibers as a high-performance anode for lithium ion batteries
Source: Royal Society of Chemistry journal article supplement (doi:10.1039/d0qi00069h), 2020-01-01
Supplement: d0qi00069h1.pdf [file d0qi00069h1.pdf]

**Electronic Supplementary information for**

**Rational design of Pea-pod structure of SiO<sub>x</sub>/C in carbon nanofibers  
as high-performance anode for lithium ion batteries**

Yuchao Zheng,<sup>a</sup> Xiangzhong Kong,<sup>a,\*</sup> Ibrahim Usman,<sup>a</sup> Xuefang Xie,<sup>a</sup> Shuquan Liang,<sup>a</sup>  
Guozhong Cao,<sup>a</sup> Anqiang Pan<sup>a,b,\*</sup>

<sup>a</sup> National Key Laboratory of Powder Metallurgy, School of Materials Science and  
Engineering, Central South University, Hunan, 410083, China

<sup>b</sup> School of Physics and Technology, Xinjiang University, Urumqi, Xinjiang, 830046,  
China

\* Corresponding authors: [pananqiang@csu.edu.cn](mailto:pananqiang@csu.edu.cn) (A.Q.Pan);

[kongxzhong@csu.edu.cn](mailto:kongxzhong@csu.edu.cn) (X.Z. Kong)

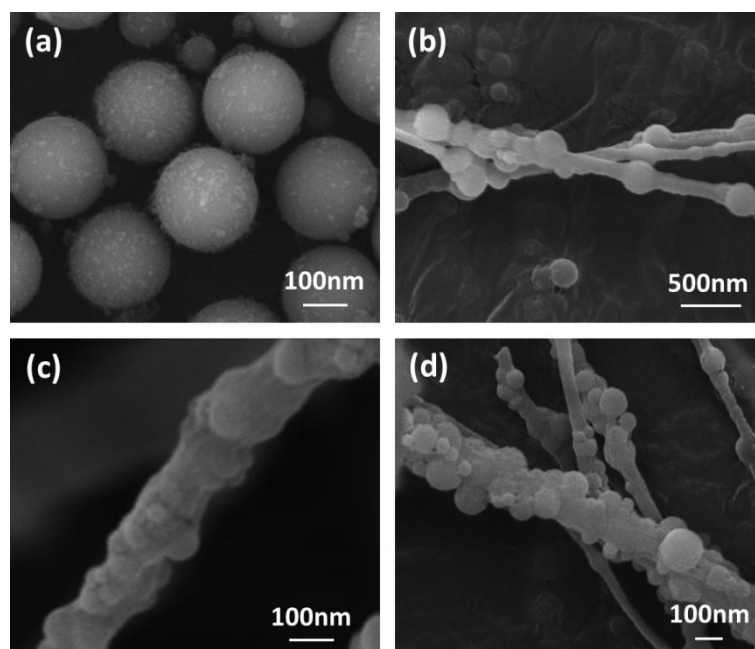

**Figure S1** SEM images of the organosilica-polymer nanospheres (a) and the as-electrospun precursors with different nanospheres additions (b-d).

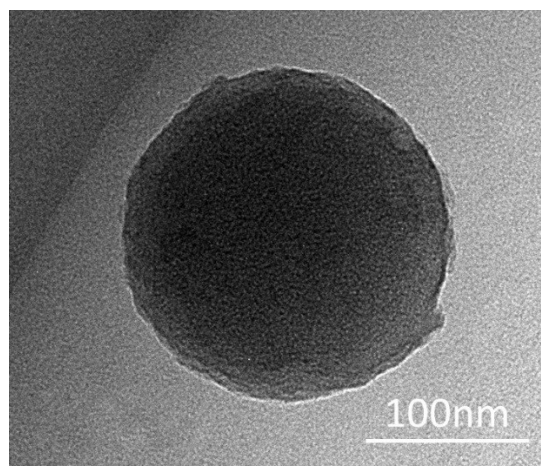

**Figure S2** TEM image of the organosilica-polymer precursor.

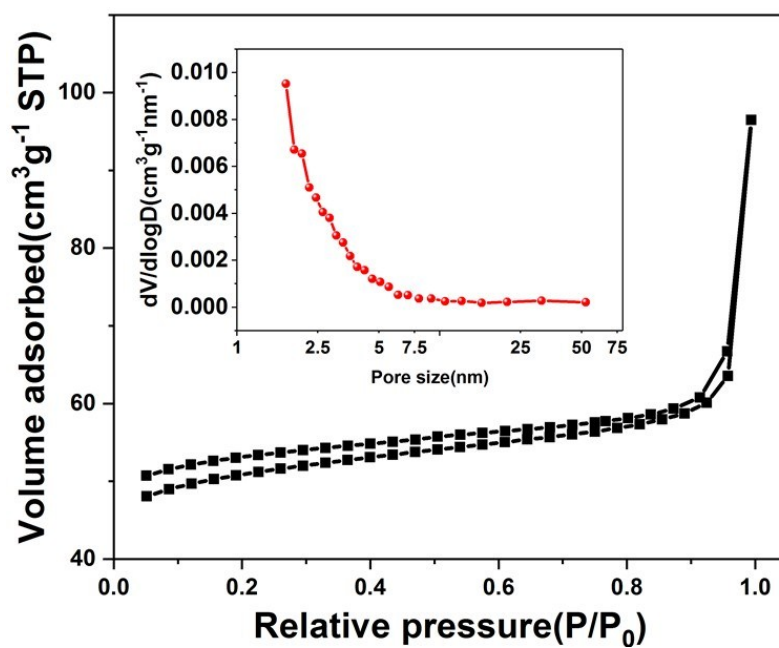

**Figure S3** Nitrogen adsorption-desorption isotherm and the corresponding pore size distribution of the SiO<sub>x</sub>/C-0.4.

**Table S1** Cycling performance comparison between SiO<sub>x</sub>/C-0.4 and SiO<sub>x</sub> based materials in previous works.

| <b>Materials</b>                      | <b>Current density (mA g<sup>-1</sup>)</b> | <b>Cycles</b> | <b>Capacity (mAh g<sup>-1</sup>)</b> |
|---------------------------------------|--------------------------------------------|---------------|--------------------------------------|
| SiO <sub>x</sub> -PVDF [35]           | 900                                        | 200           | <300                                 |
| SiO-graphite [24]                     | 500                                        | 100           | 358                                  |
| Watermelon-like SiO <sub>x</sub> [30] | 1000                                       | 600           | <400                                 |
| C-SiO <sub>x</sub> [34]               | 1000                                       | 600           | <300                                 |
| <b>SiO<sub>x</sub>/C-0.4</b>          | <b>1000</b>                                | <b>750</b>    | <b>410</b>                           |
